# Supplementary material for: Modulating the cross-plane thermal conductivity of graphite by MnCl 2 and FeCl 3 co-intercalation
Source: Royal Society of Chemistry journal article supplement (doi:10.1039/d4ta03644a), 2024-01-01
Supplement: d4ta03644a1.pdf [file d4ta03644a1.pdf]

## 1 **Supplementary Information**

### 2 **S1 Time domain thermoreflectance (TDTR)**

#### 3 **S1.1 Setup, thermal modelling fits and sensitivity analysis**

4 The setup utilized to probe thermal conductivity is shown in Fig. S1.1. Sensitivity analysis shown in Fig.  
5 S1.2 is performed to analyze highest sources of uncertainties accurately and quantitatively. These  
6 uncertainties strongly influence TDTR signals and impact the accuracy to which thermal conductivity can  
7 be precisely estimated and therefore need to be eliminated either by using known reference values or by  
8 accurately fitting using fit to data as shown in Fig. S1.3. thermal conductivity denoted by  $\kappa_z$  (W/mK) and

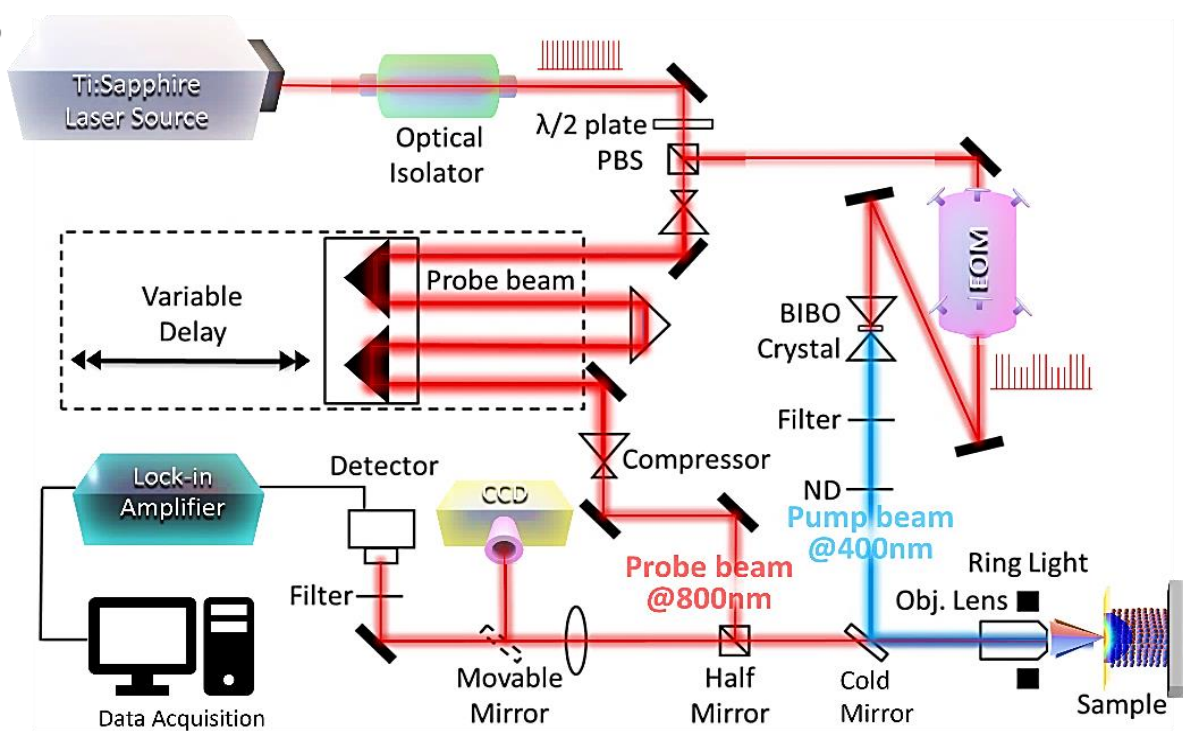

**Figure S1.1:** Experimental setup for thermal conductivity characterization

9 volumetric specific heat capacity denoted by  $C_{p_{vhc}}$  ( $\text{J}/\text{m}^3$ ).

10

#### 11 **S1.2 Picosecond acoustics**

12 We used picosecond acoustics echoes in our TDTR reflectivity data for investigating the velocity of sound  
13 propagation in samples pre and post intercalation. These echoes can be used to determine the speed at which  
14 sound waves propagate through them. The velocity of sound propagation ( $v$ ) in a material can be calculated  
15 using the formula:  $v = 2d / t$ , where  $d$  is the thickness of the material and  $t$  is the time it takes for the acoustic  
16 wave to travel through the material.

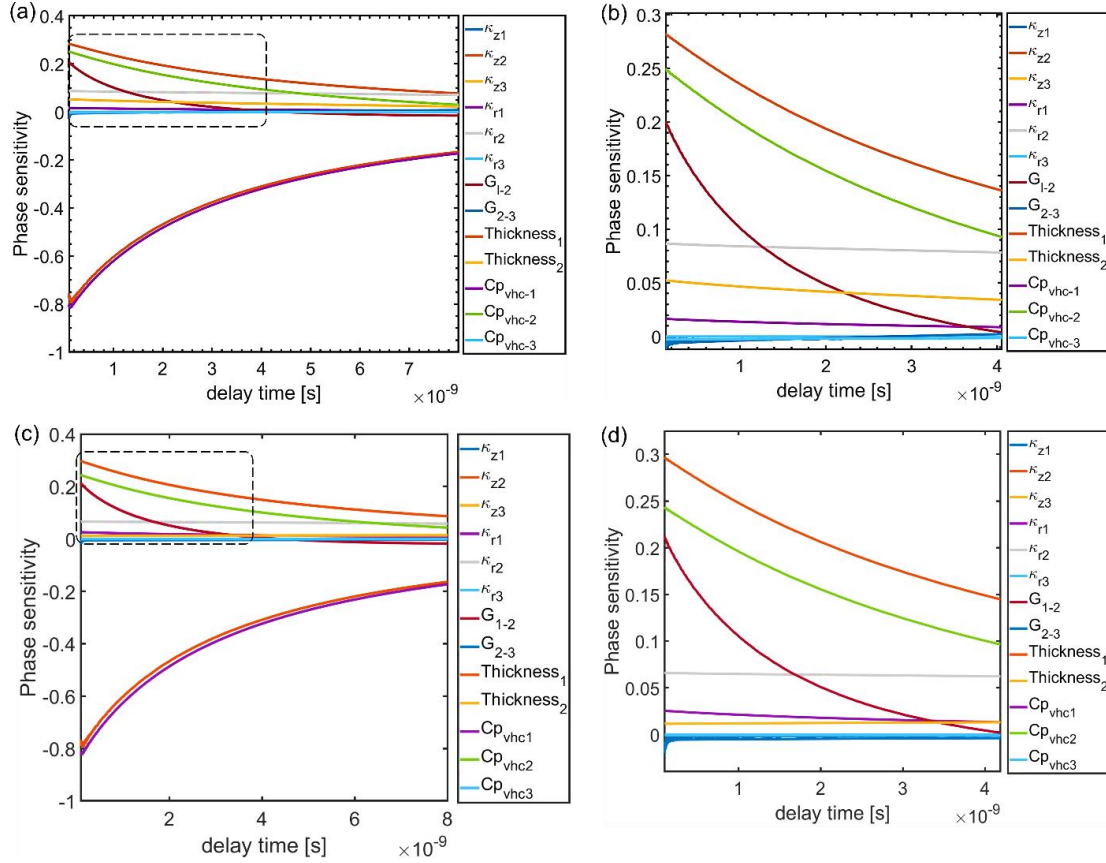

**Figure S1.2:** Sensitivity analysis pre and post intercalation. (a) Sensitivity calculation for 450 nm graphite film for different thermal properties involved with dashed region magnified in (b) from 0ns to 4 ns revealing 2 highest sensitive parameters namely  $\kappa_z$  and  $Cp_{vhc}$ . (c) Sensitivity calculation for 710 nm GIC film (intercalated counterpart of 450 nm) for different thermal properties involved with dashed region magnified in (d) from 0ns to 4 ns revealing 2 highest sensitive parameters namely  $\kappa_z$  and  $Cp_{vhc}$ .

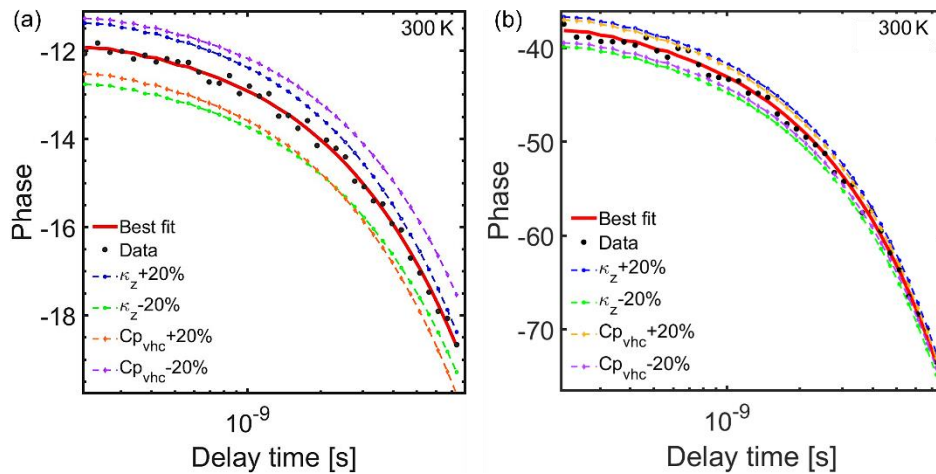

**Figure S1.3:** A typical thermal fit result at 300K of TDTR measurement for a 450 nm thick graphite in (a) and its intercalated counterpart of 700 nm thickness in (b). The phase data of TDTR measured signal for both cases are compared with the thermal modelling fit and presented along with the  $\pm 20\%$  bounds of the best-fitted value by varying most sensitive parameters that affect TDTR signal namely  $\kappa_z$  and  $Cp_{vhc}$ .

## 18 S2 Quantitative detection of Mn concentration using ICP-OES method

### 19 S2.1. Sample preparation and reagents

20 To detect traces of Mn in FeCl<sub>3</sub> powder using inductively coupled plasma optical emission spectrometry  
21 ICP-OES Agilent 5100, the following materials and reagents were utilized: FeCl<sub>3</sub> powder, High purity  
22 deionized water and acid digestion reagent (nitric acid, HNO<sub>3</sub>). Table S2.1 presents two of several samples  
23 we prepared and details sample preparation for subsequent calibration and measurement.

24

|   | Sample preparation steps                                | Higher concentration<br>sample(column B)<br>(to be used for Mn detection) | Lower concentration<br>sample(column C)<br>(to be used for Fe detection) |
|---|---------------------------------------------------------|---------------------------------------------------------------------------|--------------------------------------------------------------------------|
| 1 | empty bottle/g                                          | 17.8144                                                                   | 17.8775                                                                  |
| 2 | FeCl <sub>3</sub> powder in mg + weighing dish<br>in mg | 100.031                                                                   | 100.031                                                                  |
| 3 | Weighing dish/mg                                        | 4.742                                                                     | 4.742                                                                    |
| 4 | Prepared solution for Fe detection/g                    |                                                                           | 0.96                                                                     |
| 5 | FeCl <sub>3</sub> (only powder)/mg                      | 95.289                                                                    |                                                                          |
| 6 | Prepared solution and bottle/g                          | 118.5143                                                                  | 116.968 (C4 is diluted with 100mL<br>water)                              |
| 7 | Prepared solution/g                                     | 100.6999                                                                  | 99.0905                                                                  |
| 8 | ppm (FeCl <sub>3</sub> )                                | 1149.646                                                                  | 13.962                                                                   |

25 **Table S2.1:** Table outlining sample preparation steps involved to detect Mn in FeCl<sub>3</sub> powder from solution prepared.  
26 Two types of samples are used: 2nd column that contains the Higher concentration sample (to be used for Mn  
27 detection)- lets refer to as column B, and the last column that represents the highly diluted much lower concentration  
28 sample (to be used for Fe detection)- lets refer to as column C. The primary purpose of the analysis is to detect traces  
29 of Mn in the FeCl<sub>3</sub> powder. Column B, which contains the Mn of interest, is not diluted to allow for better detection  
30 of trace amounts of Mn. The concentrations in column B are within the detection range of the ICP-OES instrument,  
31 so further dilution is not required. Column C is heavily diluted to serve as a reference or control sample for the Fe  
32 detection. The dilution helps to separate the signals from Mn and Fe in the ICP-OES analysis.

33

|   | Detected element | Iterations      | Low Concentration sample measured @ $\lambda=238.204$ nm | Low Concentration sample measured @ $\lambda=239.563$ nm | Low Concentration sample measured @ $\lambda=261.187$ nm | High Concentration sample measured @ $\lambda=257.610$ nm | High Concentration sample measured @ $\lambda=259.372$ nm | High Concentration sample measured @ $\lambda=260.56$ nm |
|---|------------------|-----------------|----------------------------------------------------------|----------------------------------------------------------|----------------------------------------------------------|-----------------------------------------------------------|-----------------------------------------------------------|----------------------------------------------------------|
| 1 | Fe               | 1 <sup>st</sup> | 2.5 ppm                                                  | 2.482                                                    | 2.472                                                    | --                                                        | --                                                        | --                                                       |
| 2 | Fe               | 2 <sup>nd</sup> | 2.841 ppm                                                | 2.838                                                    | 2.829                                                    | --                                                        | --                                                        | --                                                       |
| 3 | Fe               | 3 <sup>rd</sup> | 3.172 ppm                                                | 3.126                                                    | 3.131                                                    | --                                                        | --                                                        | --                                                       |
| 4 | Mn               | 1 <sup>st</sup> | --                                                       | --                                                       | --                                                       | 0.769                                                     | 1.138                                                     | 0.742                                                    |
| 5 | Mn               | 2 <sup>nd</sup> | --                                                       | --                                                       | --                                                       | 0.836                                                     | 1.236                                                     | 0.814                                                    |
| 6 | Mn               | 3 <sup>rd</sup> | --                                                       | --                                                       | --                                                       | 0.943                                                     | 1.399                                                     | 0.914                                                    |

34  
35 **Table S2.2:** Concentration results obtained after the ICP-OES measurement for detecting Mn (manganese) in FeCl<sub>3</sub>  
36 (ferric chloride) powder. The table presents the concentration (in parts per million, ppm) of Fe and Mn at different  
37 wavelengths. Optimal wavelength for detecting Fe comes out to be 238.204 nm and that for Mn is 257.610 nm. Dark  
38 bordered cells corresponding to samples for Fe and Mn present their measured concentrations in ppm.

39  
40 In the above table, the important data are the 1st-3rd iterations values in the @238.204 nm column and  
41 the 1st-3rd iterations values in the @257.61 nm column. The reason for this is that these specific  
42 wavelengths correspond to the most sensitive and accurate detection of Fe and Mn in the ICP-OES  
43 measurement.

44 These values represent the concentrations of Mn in the prepared high concentration samples at the  
45 257.610 nm wavelength, which is the optimal wavelength for detecting Mn in this experiment.

46 In summary, the table presents the ICP-OES measurement results for detecting Mn in FeCl<sub>3</sub> powder.  
47 The critical data points are the Fe and Mn concentrations at their respective optimal wavelengths (Fe  
48 238.204 nm and Mn 257.610 nm). These values provide the most accurate information for analyzing the  
49 presence and concentrations of Fe and Mn in the samples.

50 From table S2.1, the solution for Fe determination is adjusted to 14 ppmw with FeCl<sub>3</sub>, The Fe equivalent  
51 4.8 ppmw. Mn is about 0.0333 (1/30) times the mass of iron (Fe). This implies the Mn concentration is  
52 around 0.16 ppmw.

53 From ICP results we can deduce Fe:Mn |<sub>ICP</sub> ~ 300, FeCl<sub>3</sub>:Mn |<sub>ICP</sub> ~ 100:0.08.

54

## 55 **S2.2. Comparing SEM-EDX wt% result of co-GIC and ICP-OES wt% result on powder**

56 Mn/Fe |<sub>EDX GIC</sub> = 0.02 >> Mn/Fe |<sub>ICP powder</sub> = 1/300=0.003 clearly demonstrates 1-order stark contrast, thus  
57 clearly affirming the strong preferential selectivity towards Mn with the current process window.

58 Based on the SEM EDX result on Table S2.3 the Mn/Fe ratio in the GIC sample being 0.02 and the  
59 ICP-OES result of the Mn/Fe ratio in the FeCl<sub>3</sub> powder being 0.002. Consequently, we see Mn preferably

60 more intercalated than FeCl<sub>3</sub> in interlayers of graphite as presented in EELS STEM mapping result Fig. 2  
61 (j). This can be attributed to our finding that Mn/Fe ratio in the GIC is significantly higher than the Mn/Fe  
62 ratio in the FeCl<sub>3</sub> powder, which supports the preferential diffusion of Mn over FeCl<sub>3</sub> within the graphite  
63 layers. Therefore, the EELS STEM mapping result is consistent with the SEM EDX and ICP-OES results.  
64 The selectivity could possibly result from current experimental process window.

| Element   | At%   | Wt%   | Wt% SD |
|-----------|-------|-------|--------|
| <b>C</b>  | 51.64 | 30.2  | 0.32   |
| <b>O</b>  | 0.48  | 0.37  | 0.05   |
| <b>Si</b> | 41.86 | 57.42 | 0.35   |
| <b>Cl</b> | 4.53  | 7.84  | 0.07   |
| <b>Mn</b> | 0.03  | 0.08  | 0.01   |
| <b>Fe</b> | 1.46  | 3.98  | 0.27   |

74 **Table S2.3:** EDX wt% result on our CO-GIC sample

### 76 **S3- Atomic-resolution electron microscopy STEM and EELS**

77  
78 The oxidation state of Manganese is determined to be 2+ based on the integral intensity ratio presented in  
79 Figure S3.2. Our results on measured peak position and integral intensity ratio shown in Fig S3.2(b,c) agree  
80 well with the literature results shown in Fig S3.1(a). Furthermore we deduce the elemental concentration  
81 ratio to be C : Cl : Mn : Fe = 77 : 14.6 : 7.0 : 0.97. We find our samples exhibit +2 Mn state on comparing  
82 our result with literature. This implies some possible reaction of Mn with another element and it safe to  
83 assume Mn reacts with Cl<sub>2</sub> to form our observed layers of MnCl<sub>2</sub> at the process parameters we employed  
84 for intercalation that seem to predominantly favour Mn to intercalate more readily than Fe.

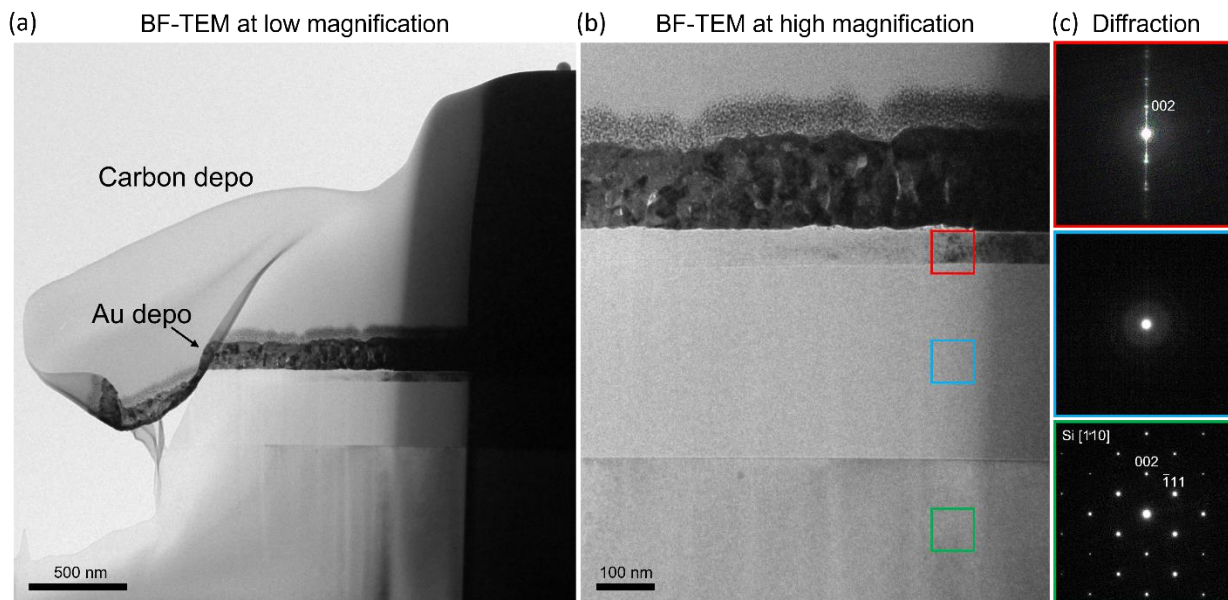

**Figure S3. 1:** Bright-Field TEM images and Diffraction spots at different regions of sample prepared for TEM and EELS imaging. (a-b) Bright-field TEM image at low and high magnification respectively. (c) Characteristic signature diffraction spots for graphite(red) region, substrate consisting of SiO<sub>2</sub>(blue square region) and silicon (green region) respectively corresponding to colored regions marked in (b).

85

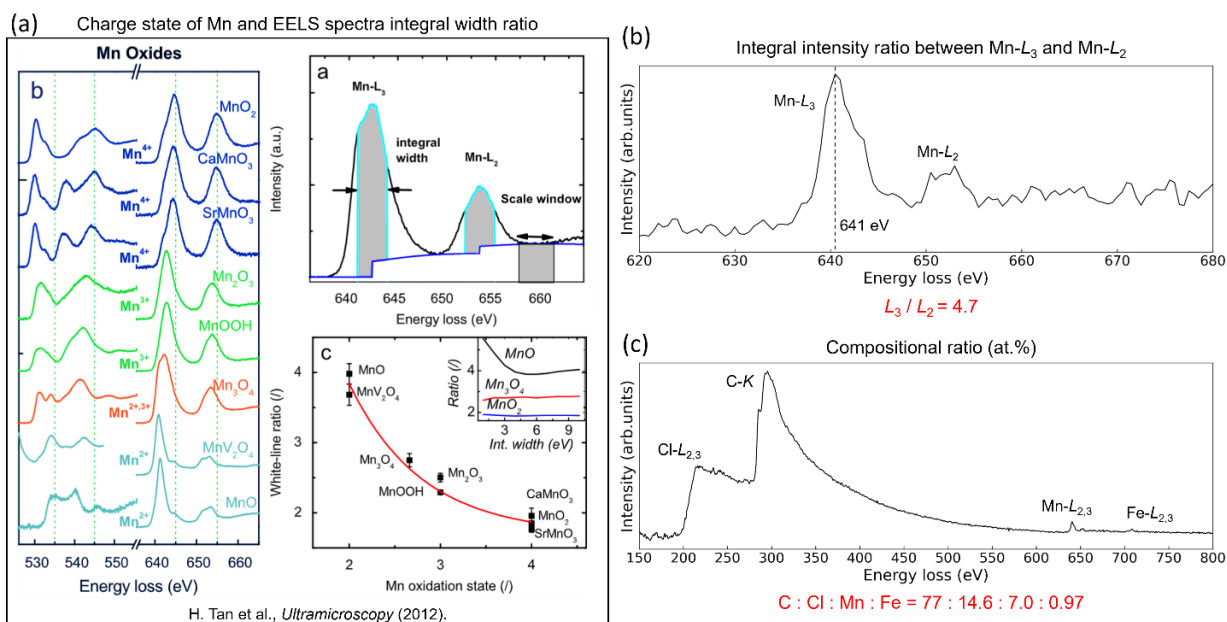

**Figure S3. 2:** Analyzing EELS spectra to investigate charge state of Mn present in our sample. (a) Various EELS profiles corresponding to multiple oxidation states Mn can possess in different compounds revealing sharply decreasing trend of integral intensity ratio with oxidation state. (b) Our result yields integral intensity ratio of 4.7 confirming +2 oxidation state (c) Elemental concentration ratio turns out to be C : Cl : Mn : Fe = 77 : 14.6 : 7.0 : 0.97.

86

87 **S4 - Determining Stage 3 large area uniformity using Raman mapping**

88 Spatial mapping of G peak before and after intercalation is characterized using Raman Spectroscopy

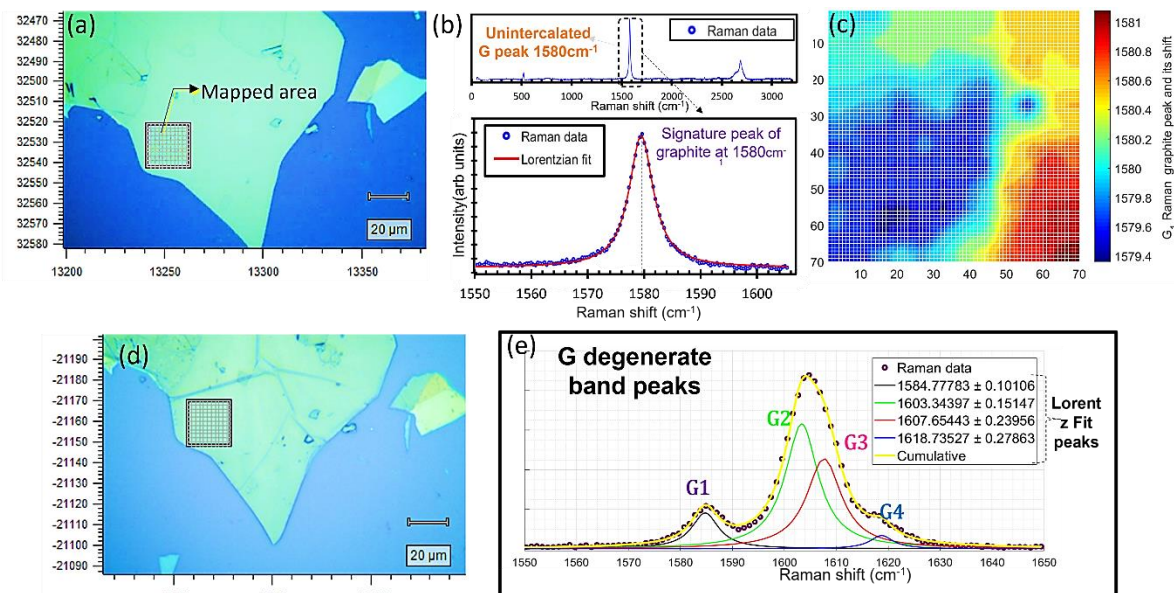

**Figure S4. 1:** Sample regions defined for mapping(a,d) before and after intercalation and their respective Raman spatial mapping averaged out results(b,e) revealing signature peaks for graphite and dominant stage-3 GICs respectively.

89 revealing homogenous stage 3 distribution in figure S4.1. Upon averaging the spatial G peak positions, we  
 90 find blue-shift of G peak from 1580 cm<sup>-1</sup> to 1605 cm<sup>-1</sup> thus suggesting *stage-3* over a large area.

91

92

93

94

95

96

97

98

99 **S5 - Mapping elemental chemical composition GIC and powder**

100 Scanning electron microscopy (SEM; JEOL JSM-6610LV) and energy dispersive X-ray spectroscopy (EDS;  
 101 JEOL JED-2300) was used to examine the elemental chemical compositional mapping of intercalant  
 102 powder and co-GIC samples as shown in Fig S5.1 and Figure S5, respectively.

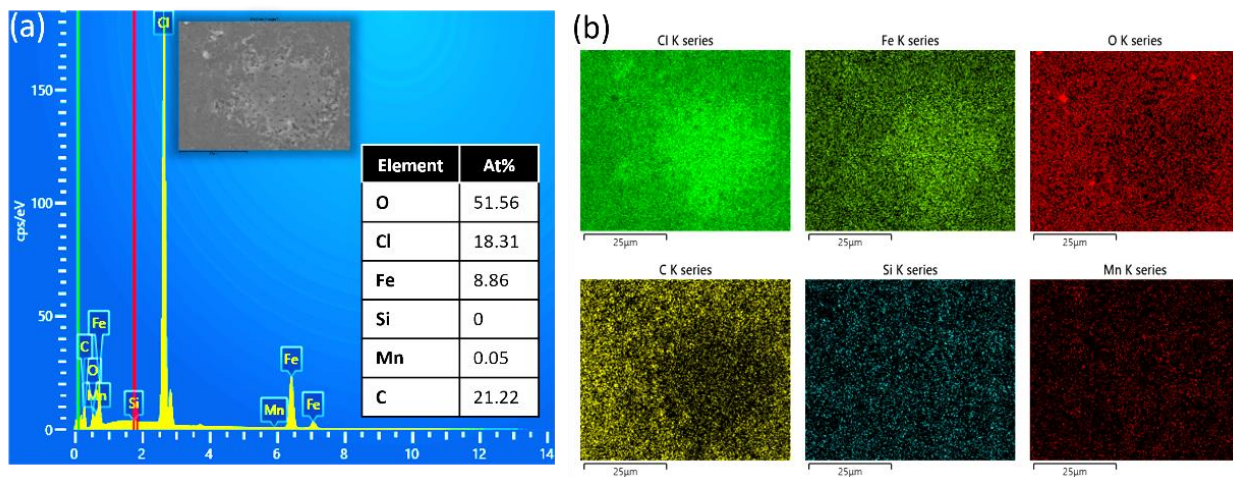

**Figure S5. 1:** SEM EDX scans of powder. (a)EDX spectra showing elemental peaks Also shows the electron image of area scanned. (b)EDX elemental mapping of region being probed.

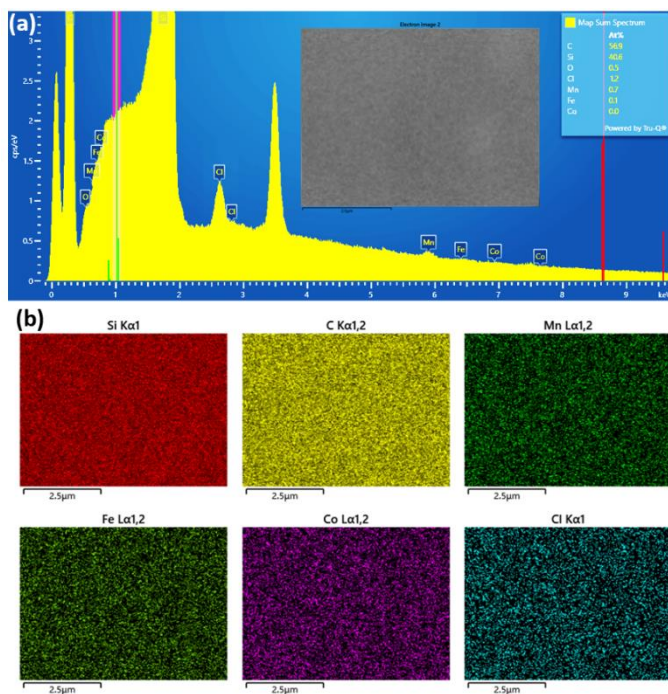

**Figure S5.2:** SEM EDX scans and elemental mappings of a GIC from same batch as samples investigated in the main text for thermal conductivity. EDX spectra showing all elemental peaks with atomic percentages proportion in table.



## 104 S6- Debye-Callaway modelling

### 105 S6.1: Phonon Scattering rates and modelling thermal conductivity

106

107 The Debye model of thermal conductivity considers both normal (N) and Umklapp (U) processes<sup>1</sup>; however,  
108 when calculating the overall scattering relaxation rate (or the associated relaxation lifetime) of phonons,  
109 the model considers only the single-mode relaxation time, which neglects the momentum-conserving  
110 characteristic of N processes. To calculate the effective scattering rate of phonons, Callaway<sup>2</sup> incorporated  
111 the momentum-conserving character of N processes as a crucial component of lattice thermal transport. The  
112 resulting thermal conductivity expression includes an extra term (other than the Debye term) known as the  
113 N-drift or Callaway term.

114 Relaxation times of three-phonon scatterings are often parametrized by expressions of the following  
115 type<sup>33,34</sup>:

$$116 \tau_{anh}^{-1} = B_T \omega^m T^n \quad (S1)$$

117 where  $m + n = 5$  and  $B_T$  is a constant over a particular temperature range. In this study, the low-  
118 temperature form of the intrinsic phonon-phonon scattering rate was applied using a semi-empirical  
119 parameterized expression, assuming the N and U processes to exhibit the same frequency dependence, as  
120 follows<sup>20,21</sup>:

$$121 \tau_{anh}^{-1} = \left[ B_N + B_U \exp\left(-\frac{\theta_D}{\alpha T}\right) \right] \omega^2 T^3, \quad (S2)$$

122 where  $B_N$  and  $B_U$  are anharmonic coupling constants or anharmonic strength pre-factors for three-phonon  
123 N and U processes that yield parametrized  $\tau_N^{-1}$  and  $\tau_U^{-1}$  expressions, respectively,  $\theta_D$  is the average Debye  
124 temperature for all acoustic branches, and  $\alpha$  is a constant.

125 The scattering rate for phonon scattering due to defects that are significantly larger than the phonon  
126 wavelength (such as boundaries) is expressed as the following:

$$127 \tau_B^{-1} = \frac{v}{\lambda_B}, \quad (S3)$$

128 where the boundary scattering length is denoted by  $\lambda_B$ , which represents actual thickness of sample  
129 before and after intercalation was used as the scattering length and is assumed to be the same for all  
130 phonons, and  $\tau_B^{-1}$  is independent of the phonon frequency  $\omega$  and temperature  $T$ .

131 The scattering rate for phonon scattering induced solely by the reduction in the characteristic length is  
132 expressed as the following:

$$133 \quad \tau_{intc}^{-1} = \frac{v}{\lambda_{intc}}, \quad (S4)$$

134 where the intercalation scattering length is denoted by  $\lambda_{intc}$ , which represents an effective length that is  
 135 determined from a low-temperature fit of data to the  $\kappa_z$ -T trend of the samples and is assumed to be the  
 136 same for all phonons, and  $\tau_{intc}^{-1}$  is independent of the phonon frequency  $\omega$  and temperature  $T$ .

137 Subsequently, a parametric formulation based on Rayleigh scattering, a law that is followed by  
 138 impurities, was used to model scattering phenomena due to impurities. Therefore, the scattering rate due to  
 139 impurity phonon scattering were expressed by the following:

$$140 \quad \tau_{Imp}^{-1} = A\omega^4, \quad (S5)$$

141 where A is the impurity-scattering strength constant or Rayleigh scattering strength, which is estimated by  
 142 fitting the experimental data to the full Debye-Callaway model, and is usually predominant near  $T_{max}$ .

143 Subsequently, the spectral Matthiessen's rule, which is commonly used to quantify the total spectral  
 144 scattering rate when multiple scattering mechanisms operate simultaneously in the system, was used for  
 145 analysis, assuming all scattering events to be independent. Thus, the total resistive relaxation rate or  
 146 scattering rate,  $\tau_C$ , was expressed as the sum of the scattering rates due to normal and resistive scattering,  
 147 as follows:

$$148 \quad \tau_C^{-1} = \tau_N^{-1} + \tau_R^{-1}. \quad (S6)$$

149 Here, the total resistive scattering rate,  $\tau_R^{-1}$ , was expressed as the following:

$$150 \quad \tau_R^{-1} = \tau_U^{-1} + \tau_B^{-1} + \tau_{Imp}^{-1} + \tau_{Intc}^{-1}. \quad (S7)$$

151 Finally, to determine the temperature dependence of the thermal conductivity of the samples before  
 152 and after intercalation quantitatively and qualitatively, a theoretical calculation (i.e., fitting) based on the  
 153 relaxation-time model using the following expression predicted by the Debye-Callaway<sup>2</sup> model in 1959  
 154 was used:

$$155 \quad \kappa = \kappa_{debye} + \kappa_{callaway} = \frac{k_B^4 T^3}{2\pi^2 v \hbar^3} \int_0^{\frac{\theta_D}{T}} \frac{\tau_C x^4 e^x}{(e^x - 1)^2} dx + \frac{k_B^4 T^3}{2\pi^2 v \hbar^3} \frac{\left( \int_0^{\frac{\theta_D}{T}} \frac{\tau_C x^4 e^x}{\tau_N (e^x - 1)^2} dx \right)^2}{\int_0^{\frac{\theta_D}{T}} \frac{\tau_C x^4 e^x}{\tau_N \tau_R (e^x - 1)^2} dx} \quad (S6.8)$$

156 where,  $k_B$  is the Boltzmann constant,  $\hbar$  is the reduced Planck constant,  $v$  is the phonon group velocity,  $x =$   
 157  $\frac{\hbar\omega}{k_B T}$ , and  $\theta_D$  is the Debye temperature that is estimated by  $\theta_i = \frac{\hbar\omega}{k_B}$ .

158

159 The Debye temperature of 900 K is reliably chosen as per reported in literature<sup>3,4</sup> Note that the model fit is  
 160 not sensitive to changes in Debye temperature, so we decided to use the literature value instead of measuring

161 or making it a fitting parameter.

162 In the cross-plane direction, the thermal conductivity is predominantly due to phonon transport, as  
163 electrons are less mobile between the weakly bonded layers. Given this established understanding<sup>5</sup> that  
164 electronic contributions are negligible in this direction, our study only focused on investigating the phonon  
165 contribution. This approach aligns with the observations by Dresselhaus et al. that the magnitude and  
166 temperature dependence of the c-axis thermal conductivity of GIC preclude any electronic contribution in  
167 this direction This enables ensuring that our analysis accurately reflects the dominant heat transport  
168 mechanism in this direction.

169  
170

| Parameters          | Units             | Before intercalation       | After intercalation        |
|---------------------|-------------------|----------------------------|----------------------------|
| $v$                 | m/s               | 4050±87.2                  | 2835±107                   |
| $d(\lambda_B)$      | nm                | 450±6.3, 110±9.2, 30±2.1   | 710±20.9, 170±11.2, 45±3.9 |
| $d(\lambda_{intc})$ | nm                | -                          | ~3-5±0.23 (for 3 co-GICs)  |
| $B_N$               | s/K <sup>3</sup>  | 1±0.61 × 10 <sup>-24</sup> | 1±0.61 × 10 <sup>-24</sup> |
| $B_U$               | s/K <sup>3</sup>  | 5±0.35 × 10 <sup>-22</sup> | 5±0.35 × 10 <sup>-22</sup> |
| $A$                 | s <sup>3</sup> /m | 230±18.4                   | 230±18.4                   |
| $\alpha$            | -                 | 3                          | 3                          |
| $\theta_D$          | K                 | 900                        | 900                        |

178

179 **Table S6.1:** Parameters used to fit TDTR data for all thicknesses and their uncertainties

180

181

182

183

184

185

186

187

188

189

190

191

192

193

194

195

196

197 **S6.2: Goodness of fit for Debye-Callaway fittings**

| <b>(a) 30 nm graphite</b>     | <b>(b) 45 nm GIC</b>          |
|-------------------------------|-------------------------------|
| R-squared: 0.980358           | R-squared: 0.928690           |
| RMSE: 0.003621                | RMSE: 0.037064                |
| Mean Absolute Error: 0.003133 | Mean Absolute Error: 0.030024 |
| <b>(c) 110 nm graphite</b>    | <b>(d) 170 nm GIC</b>         |
| R-squared: 0.963094           | R-squared: 0.798802           |
| RMSE: 0.025841                | RMSE: 0.144153                |
| Mean Absolute Error: 0.017759 | Mean Absolute Error: 0.101374 |
| <b>(e) 450 nm graphite</b>    | <b>(f) 710 nm GIC</b>         |
| R-squared: 0.785753           | R-squared: 0.736909           |
| RMSE: 0.051124                | RMSE: 0.371925                |
| Mean Absolute Error: 0.041479 | Mean Absolute Error: 0.326828 |

198 **Table S6.2:** Goodness of fit for all the fitting curves

199  
 200 The low RMSE values in our fits suggest a close fit between the model and actual observed values, with  
 201 small mean error magnitudes.

202  
 203  
 204  
 205  
 206  
 207  
 208  
 209  
 210  
 211  
 212  
 213  
 214  
 215

(a) 30 nm graphite

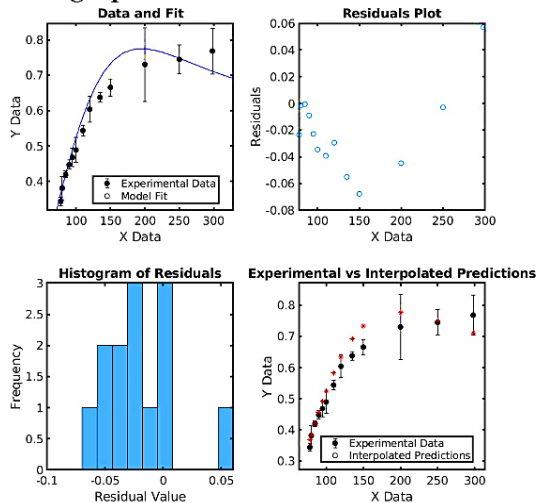

(b) 45 nm GIC

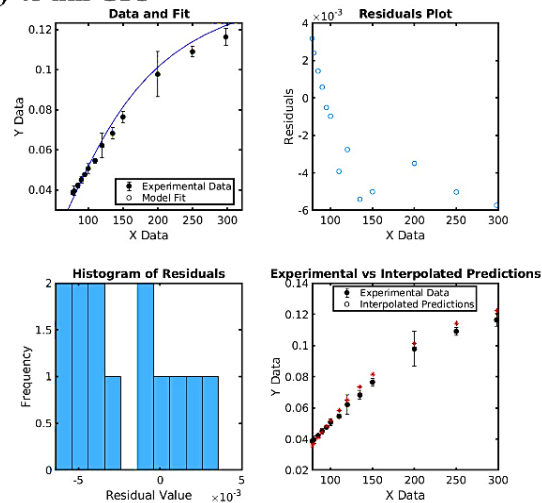

(c) 110 nm Graphite

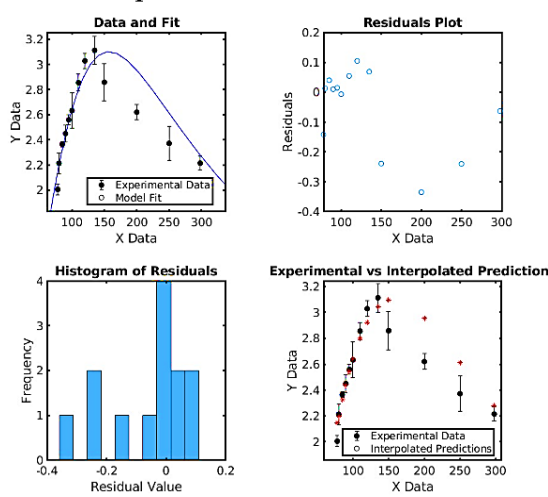

(d) 170 nm GIC

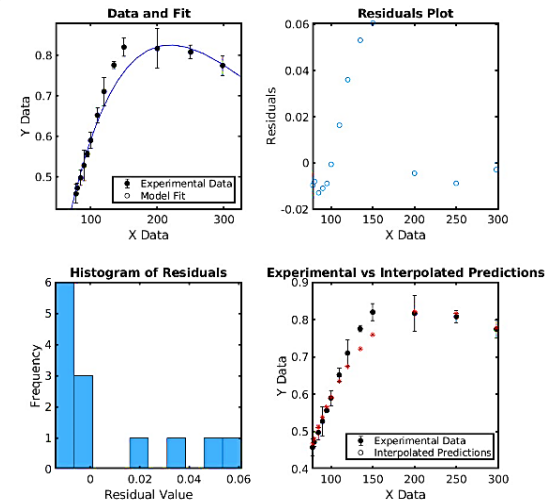

(e) 450 nm graphite

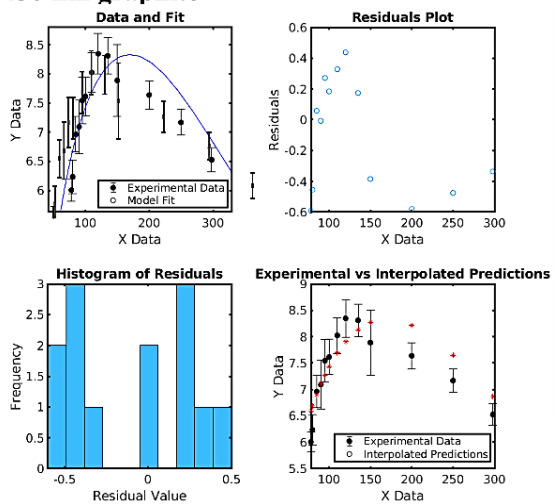

(f) 710 nm GIC

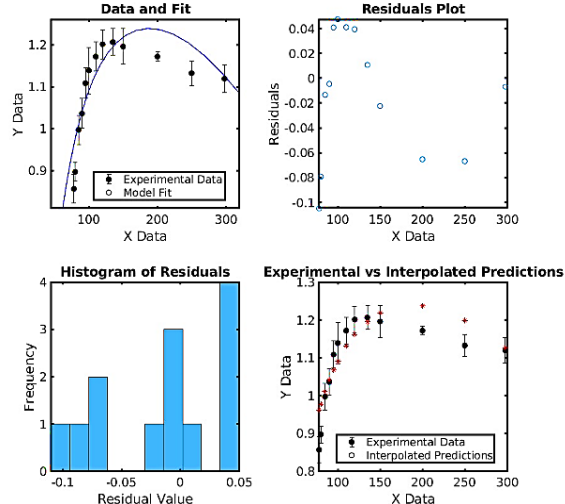

Figure S6.1: Uncertainty analysis of the theoretical model fit to each sample data and relevant statistical plots for pristine and intercalated counterparts.

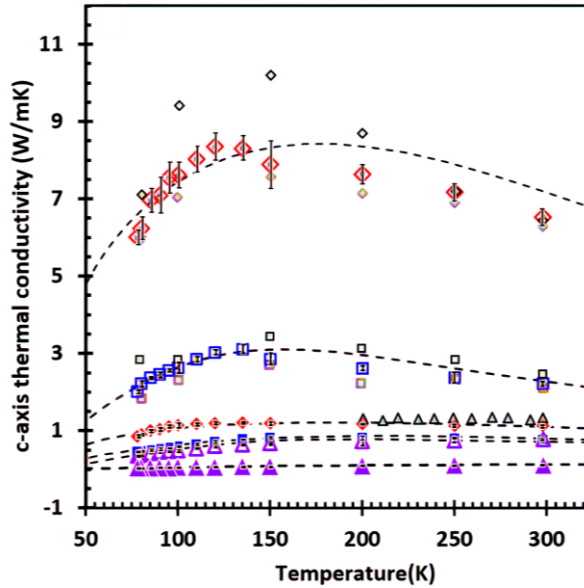

**Figure S6.2:** Measured data fitted to the Debye–Callaway model to investigate the temperature dependence of  $\kappa_z$  of graphite and the GIC counterparts in the linear-scale. The log scale data is presented in Figure 4 in main text with corresponding legend.

218

### 219 **S6.3: Reduction in effective $\varepsilon$ (LJ potential parameter) upon intercalation softens phonon** 220 **c-axis group velocity**

221

222 The 12-6 Lennard-Jones (*LJ*) potential is given by:

$$223 \quad V_{LJ}(r) = 4\varepsilon \left[ \left( \frac{\sigma}{r} \right)^{12} - \left( \frac{\sigma}{r} \right)^6 \right] \quad (S8)$$

224 where  $\varepsilon$  is the depth of the potential well,  $\sigma$  is the finite distance at which the interparticle potential is zero,  
225 and  $r$  is the distance between the particles. In the context of the interaction between C and  $\text{MnCl}_2$ , a  
226 Waldman-Hagler mixing law<sup>6</sup> is used to calculate the combined epsilon ( $\varepsilon$ ) for the interacting species  
227 based on the individual  $\varepsilon$  and  $\sigma$  values of C, Cl, and Mn<sup>7</sup>. The formula for the mixing law is:

$$228 \quad \varepsilon_{ij} = \frac{2\sqrt{\varepsilon_i \varepsilon_j} \sigma_i^3 \sigma_j^3}{\sigma_i^6 + \sigma_j^6} \quad (S9)$$

- 229
- $\varepsilon_{ij}$  is the effective depth of the potential well for the interaction between i and j.

- 230 •  $\sigma_{ij}$  is the effective distance at which the potential energy is zero for interaction between i and j.
- 231 •  $\epsilon_i, \epsilon_j$  are the depth of the potential wells for i and j, respectively.
- 232 •  $\sigma_i, \sigma_j$  are the distances at which the potential energy is zero for i and j, respectively.

233 Applying this to the given data (  $\epsilon$  and  $\sigma$  values for C, Cl and Mn<sup>1</sup> ;  $\epsilon_C = 7.3 \times 10^{-22}$  J/atom,  $\sigma_C = 3.40$  Å,  $\epsilon_{Cl} =$   
 234  $1.8 \times 10^{-21}$  J/atom,  $\sigma_{Cl} = 4.40$  Å,  $\epsilon_{Mn} = 9.1 \times 10^{-23}$  J/atom,  $\sigma_{Mn} = 2.50$  Å ) and considering the effectiveness of  
 235 the LJ potential diminishes with distance and since MnCl<sub>2</sub> is intercalated between graphene layers, not all  
 236 atoms of MnCl<sub>2</sub> are in close proximity to C atoms, leading to a varying degree of interaction strength making  
 237 only the nearest pairwise interaction significant. The effective averaged out  $\epsilon$  value for the C-MnCl<sub>2</sub>  
 238 interaction can then be given by  $\epsilon_{C-MnCl_2} = \frac{\epsilon_{C-Cl} \times 2 + \epsilon_{C-Mn}}{3}$  is about  $5.8 \times 10^{-22}$  J/atom which is a 21% drop  
 239 when compared to the  $\epsilon$  value for C-C interaction in graphene,  $\epsilon_{C-C}$  which is  $7.3 \times 10^{-22}$  J/atom. This  
 240 reduction signifies the softening of the C-C interaction in the presence of MnCl<sub>2</sub> intercalation within  
 241 graphene layers implying a reduction in the strength of bonding forces and thus phonon velocity. Note that  
 242 since the number density of crystalline MnCl<sub>2</sub> layer is smaller than that of graphene, the actual contrast is  
 243 expected to be higher.

244

## 245 References

- 246 (1) Maznev, A.; Wright, O. Demystifying umklapp vs normal scattering in lattice thermal conductivity. *American*  
 247 *journal of physics* **2014**, *82* (11), 1062-1066.
- 248 (2) Callaway, J. Model for lattice thermal conductivity at low temperatures. *Physical Review* **1959**, *113* (4), 1046.
- 249 (3) Krumhansl, J.; Brooks, H. The lattice vibration specific heat of graphite. *The Journal of Chemical Physics* **1953**, *21*  
 250 (10), 1663-1669.
- 251 (4) Bowman, J.; Krumhansl, J. The low-temperature specific heat of graphite. *Journal of Physics and Chemistry of*  
 252 *Solids* **1958**, *6* (4), 367-379.
- 253 (5) Issi, J.-P.; Heremans, J.; Dresselhaus, M. Electronic and lattice contributions to the thermal conductivity of graphite  
 254 intercalation compounds. *Physical Review B* **1983**, *27* (2), 1333.
- 255 (6) Waldman, M.; Hagler, A. T. New combining rules for rare gas van der Waals parameters. *Journal of computational*  
 256 *chemistry* **1993**, *14* (9), 1077-1084.
- 257 (7) *Lennard-Jones Force Fields and potential energy. forcefields.* 2021.  
 258 [https://simonensemble.github.io/PorousMaterials.jl/dev/force\\_field/](https://simonensemble.github.io/PorousMaterials.jl/dev/force_field/) (accessed 231015).
- 259
